# Supplementary material for: Prevalence and Determinants of Depressive Symptoms among Young Adolescents in Malaysia: A Cross-Sectional Study
Source: MDPI journal article supplement (doi:10.3390/children10010141), 2023-01-11
Supplement: s1 [file s1]

## Supplementary materials

### Supplementary S1. Sample size estimation using G Power.

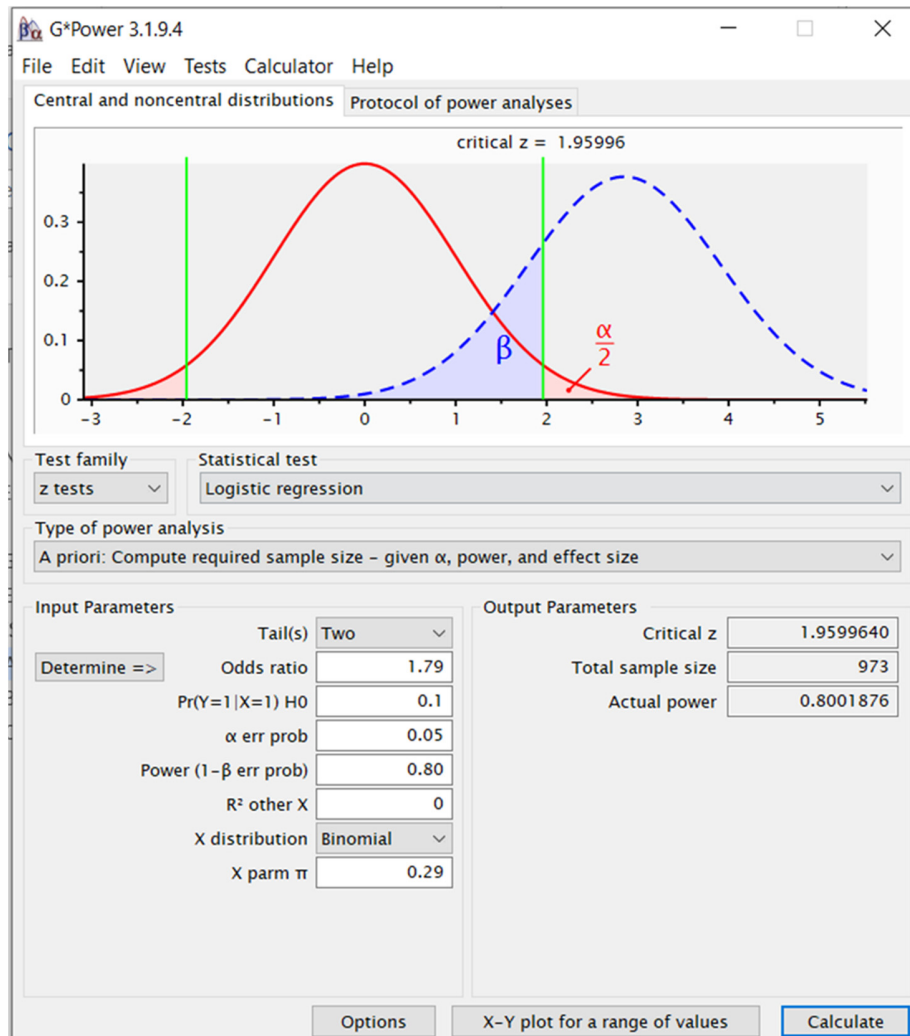

**Supplementary S2.** Test of multicollinearity.

**Model 1.** Variables in the Equation - Factors associated with depression among adolescents.

|                         | Gender | Age   | Ethnicity | Smoke | Alcohol | Drug use | Bullied | Felt lonely | Parental marital status | Supervision | MHL   |
|-------------------------|--------|-------|-----------|-------|---------|----------|---------|-------------|-------------------------|-------------|-------|
| Gender                  | 1.000  | -.031 | -.015     | .125  | .101    | .043     | .169    | .089        | .014                    | .049        | .027  |
| Age                     | -.031  | 1.000 | .019      | -.055 | -.046   | -.041    | -.021   | -.019       | .029                    | .007        | -.014 |
| Ethnicity               | -.015  | .019  | 1.000     | .054  | -.019   | -.137    | .008    | .050        | .029                    | .088        | .002  |
| Smoke                   | .125   | -.055 | .054      | 1.000 | -.164   | -.149    | -.051   | .044        | -.025                   | -.109       | .115  |
| Alcohol                 | .101   | -.046 | -.019     | -.164 | 1.000   | .024     | -.042   | -.072       | -.005                   | .049        | -.019 |
| Drug use                | .043   | -.041 | -.137     | -.149 | .024    | 1.000    | -.008   | .018        | -.017                   | -.032       | -.032 |
| Bullied                 | .169   | -.021 | .008      | -.051 | -.042   | -.008    | 1.000   | .045        | .016                    | -.056       | .034  |
| Felt lonely             | .089   | -.019 | .050      | .044  | -.072   | .018     | .045    | 1.000       | .062                    | -.053       | -.053 |
| Parental marital status | .014   | .029  | .029      | -.025 | -.005   | -.017    | .016    | .062        | 1.000                   | .015        | -.007 |
| Supervision             | .049   | .007  | .088      | -.109 | .049    | -.032    | -.056   | -.053       | .015                    | 1.000       | -.045 |
| MHL                     | .027   | -.014 | .002      | .115  | -.019   | -.032    | .034    | -.053       | -.007                   | -.045       | 1.000 |

*Note.* Cramer's *V* values of more than 0.3 indicate evidence of multicollinearity among variables.

**Model 2.** Variables in the Equation - Factors associated with depression among female adolescent.

|             | Age   | Ethnicity | Smoke | Alcohol | Drug use | Bullied | Felt lonely | Supervision | MHL   |
|-------------|-------|-----------|-------|---------|----------|---------|-------------|-------------|-------|
| Age         | 1.000 | .075      | -.023 | -.090   | .041     | -.059   | -.045       | -.009       | -.006 |
| Ethnicity   | .075  | 1.000     | .003  | -.042   | -.055    | -.032   | -.002       | .043        | -.026 |
| Smoke       | -.023 | .003      | 1.000 | -.028   | -.203    | -.111   | .086        | -.043       | .194  |
| Alcohol     | -.090 | -.042     | -.028 | 1.000   | -.130    | -.003   | -.008       | .058        | .038  |
| Drug use    | .041  | -.055     | -.203 | -.130   | 1.000    | -.066   | .026        | -.057       | -.068 |
| Bullied     | -.059 | -.032     | -.111 | -.003   | -.066    | 1.000   | .112        | .010        | .064  |
| Felt lonely | -.045 | -.002     | .086  | -.008   | .026     | .112    | 1.000       | -.053       | -.117 |
| Supervision | -.009 | .043      | -.043 | .058    | -.057    | .010    | -.053       | 1.000       | -.034 |
| MHL         | -.006 | -.026     | .194  | .038    | -.068    | .064    | -.117       | -.034       | 1.000 |

*Note. Cramer's V values of more than 0.3 indicate evidence of multicollinearity among variables.*

**Model 3.** Variables in the Equation - Factors associated with depression among male adolescent.

|                         | Smoke | Alcohol | Drug use | Bullied | Felt lonely | Parental monthly income | Supervision |
|-------------------------|-------|---------|----------|---------|-------------|-------------------------|-------------|
| Smoke                   | 1.000 | -.236   | -.123    | .000    | -.003       | .007                    | -.193       |
| Alcohol                 | -.236 | 1.000   | .015     | -.072   | -.105       | -.027                   | .106        |
| Drug use                | -.123 | .015    | 1.000    | .017    | .006        | -.099                   | .011        |
| Bullied                 | .000  | -.072   | .017     | 1.000   | -.012       | -.126                   | -.120       |
| Felt lonely             | -.003 | -.105   | .006     | -.012   | 1.000       | -.019                   | -.022       |
| Parental monthly income | .007  | -.027   | -.099    | -.126   | -.019       | 1.000                   | .028        |
| Supervision             | -.193 | .106    | .011     | -.120   | -.022       | .028                    | 1.000       |

*Note. Cramer's V values of more than 0.3 indicate evidence of multicollinearity among variables.*

**Supplementary S3.** Test for interaction.

**Model 1.** Variables in the Equation - Factors associated with depression among adolescents.

|                                                                                                                                                                 |                                                                                                                                       | B      | S.E.     | Wald    | df | Sig. | Exp(B)    |
|-----------------------------------------------------------------------------------------------------------------------------------------------------------------|---------------------------------------------------------------------------------------------------------------------------------------|--------|----------|---------|----|------|-----------|
| Step 1a                                                                                                                                                         | Age by Alcohol by Bullied by Drug use by Ethnicity by Gender by Felt lonely by MHL by Parental marital status by Supervision by Smoke | 9.408  | 2919.770 | .000    | 1  | .997 | 12191.313 |
|                                                                                                                                                                 | Constant                                                                                                                              | -1.472 | .070     | 442.455 | 1  | .000 | .229      |
| a. Variable(s) entered on step 1: Age * Alcohol * Bullied * Drug use * Ethnicity * Gender * Felt lonely * MHL * Parental marital status * Supervision * Smoke . |                                                                                                                                       |        |          |         |    |      |           |

**Model 2.** Variables in the Equation - Factors associated with depression among female adolescents.

|                                                                                                                              |                                                                                                  | B      | S.E.    | Wald    | df | Sig. | Exp(B) |
|------------------------------------------------------------------------------------------------------------------------------|--------------------------------------------------------------------------------------------------|--------|---------|---------|----|------|--------|
| Step 1a                                                                                                                      | Age by Alcohol by Bullied by Drug use by Ethnicity by Felt lonely by MHL by Supervision by Smoke | 2.298  | 499.844 | .000    | 1  | .996 | 9.953  |
|                                                                                                                              | Constant                                                                                         | -1.103 | .090    | 150.610 | 1  | .000 | .332   |
| a. Variable(s) entered on step 1: Age * Alcohol * Bullied * Drug use * Ethnicity * Felt lonely * MHL * Supervision * Smoke . |                                                                                                  |        |         |         |    |      |        |

**Model 3.** Variables in the Equation - Factors associated with depression among male adolescents.

|                                                                                                                                |                                                                                                  | B      | S.E. | Wald    | df | Sig. | Exp(B) |
|--------------------------------------------------------------------------------------------------------------------------------|--------------------------------------------------------------------------------------------------|--------|------|---------|----|------|--------|
| Step 1a                                                                                                                        | Alcohol by Bullied by Drug use by Felt lonely by Parental monthly income by Supervision by Smoke | .790   | .288 | 7.506   | 1  | .600 | 2.203  |
|                                                                                                                                | Constant                                                                                         | -2.158 | .127 | 287.942 | 1  | .000 | .116   |
| a. Variable(s) entered on step 1: Alcohol * Bullied * Drug use * Felt lonely * Parental monthly income * Supervision * Smoke . |                                                                                                  |        |      |         |    |      |        |

Note. \*Non-significant value ( $p > 0.05$ ) indicates no evidence of interaction.
